# Supplementary material
Source: publisher figshare collection journal article supplement (https://gsajournals.figshare.com/ndownloader/files/17615414)
Supplement: Supplementary file 1 [file 17615414]

>japonicaEND3
myyspttpvhltsypnemgaiyytdslhsadqsqclnpihdptslfaienntlnncdrlmyqdpfeynnpivensgyygirnysqfeippsyhypfvsneessswnpnygkplnsspsqfydspqqlqsfavsfppsrpsnkitkksekvakvrktskmhqntccsncgisettlwrrseiglpecnacntyervkghkrpaelwnkptmkrrrrplakveqktlcgegfn
>afraEND3
mdsffsssstsssssssgndfmyhppdqvfgtasghiqanvktepfpiqhddfetafqdvathtdfpqeeqkhlarnqdffydqqqvvaqntypfqpaqhfqnvfpqdnnmhfynqpyphqmghfveqpimmqqpfnqpredlkenvvgpikgrrrlqkkastlhtnssccncgtretkmwrrneqgepecnscnlyfrnkgvprpenlwnkptaqrrrrpvasvqrq
>sulstoniEND3
mdsfsssssssfgadfhgqmppysphqvygtpspnqnpmvemrsvsgfeanenqqqsyhqdfqqdnqqylvpnqdyfydeqgfvvqnefplqqnvqnyyepnngpffynqqypgqmeqfveqpredfvelreemkennfgpvkgrrraakkqekkastlhvnsfccncgtretkmwrrnergepecnscnlyfrskgvarpqhlwnkpttqrrrrpaaqahqq
>waitukubuliEND3
mypsssssfsssgystpsqsssgfsteipcfdqygnmvstenpvmqlvdytllpldyalsnnefggvaytgkpgqgavpvvqfqfsipqstyffrsshpefqrlriefvdafpyfagvpintppntfpddpqeniprkkrvskmkkvrreqgisgkripglqvstmhlntvcsncgtretklwrrteqgepecnpcnlyfrmkngvkrpphlwnkptatrkrrpmvvaavesdiennh
>panamensisEND3
mypssssssgysfssqsdnssgfstsmsysnqygnmvptgnspmqqvafsqhqyqyqypvsnnnfaamytdnqqpavfnngnqtvqafmaynhngqvnndlaqnfnsfgcnydqmtntfiqnpavtplgtqnlqvldpnqfsyqnglpitsdtmdfnnysgnqkenvprkmrskktkkpstmhlntscsncgtrdtklwrrteqgepecnpcnlfsrskngakrpqhlwnkptatrkrrpmaqqvaesnq
>nouraguensisEND3
mypsssafspddypmpyspnmvpngnppmqpadyplqhqqylvgqqdfgmmyphaqqvpfnpvhqnmqndfgmnmpvnqgyahnadpfgytqnmlpafpdyfaavpytdpnqfsssnghpintppptfqdysgqeniskkmkknkekkmstmhlntscsncgvretklwrrneqgepecnacnlyfrmkgvarpqnlwnkptatrkrrpmapiadeiqednq
>beceiEND3
mypsssafspddypmpyspnmvpngnppmqpldfplqqqqyavnqqgfdmmypqeqkvapfnpvpqnmqndckpdlgmmypqdqqvpfnpqnmpfgmnvpfdhgyahnadpfaydqnmlpgfpnpmdyfaavpytdphqfassnglpintpppnfddysgqgsvsrkikknkekkmstmhlntscsncgvretklwrrnekgepecnacnlyfrmkgvvrpqnlwnkptatrkrrpmapvadenqvknegdnq
>kamaainaEND3
mhsstsssyvfsnyaystqqplvemttpspmmaqgayntpspqldylhcnqypnyqlpydqhqfssngcfygmnqtdfqgqyqtadycsvpsaelqtqspilnfectgvyqesainpqvfglesattteeprgtkrkqtknrvkkvskmhlntqcshcgtretkmwrrnenglpecnpcnlyerlkgekrpehlwnkpsakrkrrpvapstf
>inopinataEND3
mysnsysstscssshssfgsaemqsgftqkafnnegyevqavpmplavnnhmnyhsfpqeghvmmdhsqvfgianeamqentvriqsgptyqhlqpigfsdqqfhqfpannyslngyngvmvpnhqpcvigefkligsmetrppkrsskkgvkkvstmhqnsicancgcretkmwrrnekgepecnpcnlyerlkghkrperlwnkppsmrrrrpvapinnnaisey
>elegansEND3
mysnsfsssssssnspmsfdfgfpqfpeqvqfneegygtpspdvlqnmnyhhypaqdmttnsynggydnsmqqnfmqpdngagyynenyqqmpdfqfpvqnfdftnqfefttpindlqqsqtsinhtnpdnnensmpeipidggfnffpaqevqewkparkasknkikkistmhinsscsncgcretklwrrneqgetecnpcnlyervkghkrpqhlwnkpaakrrrrpvaplvdsnafnf
>doughertyiEND3
myssssssssyssssnsnspptqmpnqmfyvssgdqittdfgygtihpqdvdvnhqmnsyqfqrddnqlltpktekveytgdqflshpttqqfeqfvpvggihgnndavfggqenfqqfgyfniphgvcspnagffdqnafvditnqqvhqnydvsntgfnylpmqmqmelssiaeapqvkpkrrrapkeeikkvssamhqnsfcsncgcretklwrrdingfpecnacnlyermnktkrpqhlwnkvsgkrtrrpvvrvvqdnemeneedddkqy
>tropicalisEND3
mysysssssnqpaqmpnemffqdgnfqyvqaapvdqnqmvfnqfqgenqmmvpqvnylmdqpfgnnmeyygrsfslktlstieisgaaqpncqyaamdygqigqmvpqqnnenmfdynfeaapapaprkrrspktgvqkvamhantscincgcretklwrrnekgepecnpcnlyerfkgtkrpahlwnkptikrrrrpvaqvneapqvkedf
>brenneriEND3
myphssssssaayyspsnnppppmfyhnlnsvqlfgygmpmdqqmhfhpiqtenqqmmaqqyikteemaydqqqfvaqpaeqfvripdgmvygqpaypvmnimtpyhqqpainqmdfatqlldyedpigknnsifefsgqpaypvmnstvpyqqqpvidqtsldfattlldyedpignienvtpsapeqrrkrsetkksvttggkmhqntecvncgcretkmwrrnergepecnpcnlyercngskrparlwnkptirrrrrpavepveqeagpstkmprmkteidnyf
>remaneiEND3
myshsfssssfsssstnsnsppstqmfgadnsmvqvydqgygtpapqpgmpmvppmnyhhfpqdmmtnqpfamapvdngmmfygqdqqqfppmqyqmqpmvdqgipqefqqnyqqdmyqqvpdqlqvmnqdfnymvnnevlddannaydfnkvpeqqqnenfnfgevparaprrrcskkkekkvstmhlntscsncgtretklwrrnergepecnpcnlyerfkgekrpqhlwnkptikrrrrpvapianevneefgn
>latensEND3
myshsfssssfsssstnsnsppstqmfgadnsmvqvydqgygtpapqsdmsmvppmnyhhfpqdmmtnqpfpmapvnngmmfygqdqqqfppmqyqmqpmadqgipqefqqnyqqdmfqqvpdqlqvmnqdfnfmvnnevlddannaydfnkvaeqqqnenfnfgevpahaprrrcskkkekkvstmhlntscsncgtretklwrrnergepecnpcnlyerfkgekrpqhlwnkptikrrrrpvapianevndevgn
>nigoniEND3
mysqsfssssstnsnytapidptfhsqgfdmgygtpspgmpmdynnmmtnqqfgpdamgppndgmmfyghqqfppmaeqfpmmdfqmmpeqnmdsgfqqnfqlgfqqdhfqpqpipmaqihrqesssnssadfdfngvngnlangfpappvhdynfaassppapkrkftkkkvpkvstmhlntscsncgtretklwrrneqgepecnscnlyertkgvkrpatlwnkptikrrrrpaaapviqernddvdgwnqsffhit
>briggsaeEND3
mysqsfassssstnsnytvpidpmfhyqgfdmgygtpspgmpmdynnmmtnqqfrsdsmgppndgmmfyghqqfppmaeqfpmmdfqmmpeqamdsgfqqnfqlgfqqdrfqplphqipmaqsdiihrqdsslnsspdvdfnevngnfvngmngfpappvndynfsttsppppkrkftkkkvpkvstmhlntscsncgtretklwrrneqgepecnscnlyertkgvkrpatlwnkptikrrrrpvvapvtqe
>sinicaEND3
mysqsfssssyssssnsntppntvadpiyldipqsfdqgydnpvqpldmelmgyhqqnnmmmmehqpfgadpmlepdngaadyygqqyqvmdqqyqmdyqmmqhqmmmpaapqnfqpefqldlfqpmpqqmpieqldfdfignnggldtpnifnglenlpprptdnydfinaqppaprrkstknkapklstmhintsctncgtretklwrrnekgepecnpcnlyerfkgekrpphlwnkptikrkrrapaaqivpvlqeakdemhe
>zanzibariEND3
mytqsflsssystssnsntpptpstmdpmyqnipqpfdhgysnptqqldmgmmgyhqpnnmmmmmqpfgrnvmipannetdyyghqlqdlnqqypldyqmmpqqmmvpetlqnyqggfqqdvfqpipelmpngqhdfgyldntqesgtpdfhngienlppipvdnysfinsqpsaprrkstkkkvpkvstmhlntscsncgtretklwrrnemgeaecnpcnlyhrttgvkrpeslwnkptikrkrrapaapvvqnlkne
>tribulationisEND3
mysqlssssysspsnsnspptpavpmypdipqpfhqgfanpaqsfdmgmmgyqnnmmmmpnqpfvpegmmqgnngveyydqqlqgrypidypmmpqqqmaagtihtfqpgyhqdvfqpipqqipidqhnfgymdntqvpeppvfyngfenlppapvnnyefitdqpaasrrkytkskvpkvstmhlntacsncgtretklwrrnekgepecnpcnlyerfkgskrpanlwnkptikrkrrapvapvvqddnddme
>japonicaEND1
mypasspsssestnnqncyayavwkdgvlhpqvmqfsqshgnptpdeefaqqagenlnfaenvanqynpmmeqamfyeefgqyftmpmynvapihpppppppphehssmfgsidqnaqptgyvqygmepqnycvdadkenvpvkaresrraapvkktsnfhrnsqcsnpncgtrettlwrrteqgavecngcslyyrkngvqrpaelcqkaimrrnrrprvsnvl
>afraEND1
mysqfsfastssdvttssgsssqdqnavpmfydyvdkegvvhrhemrfsanhgrpepvsdsfqedfgqyfvpsvayvppqlttppsnsmfgsmdpsmvyspfpvpayqftpsplgnqasnfkdfkkvtstkkktmkatsiqanyvcsnqncqtrettlwrrtengdrecnacclffrkngyarpaehcakkimrrhrrprtdtctdpaaptsslhke
>sulstoniEND1
mfspfpssptpsgipmtsessttqdqnaaplfydyvdkhgvvhrhemrfaanhgrpdptdsfqedfgqyfvpsfaypsqqfatppashsmfgsmdpsigyspypmpayhtspsplpaqpskeskksgsrktpmkpsqfhsnsvcsnpncqtrettlwrrtesgevecnacclyfrknrvqrpadlctkkimrrnrrprvetrpvapiapvvvllddetti
>waitukubuliEND1
mypssfssssssnecstpnsttqyfyeyqkdgvkyreemhfgpnhgnpspvgtpdntlyqsvleqqpthfyddfgqyfvnpyippgqqqqpqpvapqsmfgsfdpntinvyqpytdfpeltvnqenkpipssrrngpkkpstfhrnsmcsnpscgtrqttlwrrtdagavecnacslyfrkngvqrpaelcnktilkrnrrprvectakrtehgvqalqnvlqngqqll
>panamensisEND1
mypssstsssssssnhcsptnpstqyfyeyqkdgvkyreemhfgpnhgnpspiespdntyypafdvsqptefhndfgqyfvnsansyippshqqfaptqsmfgsfdatyqsypsipelkvnqennsgfasrksgpkkpsifhrnsvcsnpscgtrettlwrrtdagaiecnacslyfrknhiqrpaelcnktilkrnrrpraecvtknngqplqdmllnaqlp
>nouraguensisEND1
myssssssssdlspsdstpryyydyekdgvkhreemhfapnhgnpspiaspdntfyqpaldiqpshfhddfgqyfmnpsffpavqqteeqqfvpahpmfgsfdtlyqypvtehginqenalisrkssskklstfhrdsmcsnpncgtrqttlwrrtdsgavecnacslyfrkngvqrpaelcnktilkrnrrpraeclpkqvdieplqsvqqngqls
>beceiEND1
myssssssdpspsdstphyyyeymkdgvvkreemhfgpnhgnpspiaspdnslyqpaldiqhasyqedfgqyfmnsfiptpqqqleeqhfvpahpmfgnfdtlyqypvveainqenkpiprkssakkpstfhrnsmccnpncgtrqttlwrrtdsgavecnacslyfrknkvqrpaelcnktilkrnrrprveclpkpvdmqplqnvqqngqls
>kamaainaEND1
mypssssssstsssssspptapytygiidkngvlhshemhfsqnhgnpspiqsnggyqtapvhyvvdqyhedfgqyfvhpylpaqpvtqihpmfgsfdvsnysqqypqvgqnyrieeeepeqesppvsrkssskkpstyhrnsvcsnpncgtrettlwrrtdnggiecngcslyfrkngvqrpaelcnkvimkrnrrprrdv
>inopinataEND1
mfpssssstsspsaiqsvpytygvidkdgkvhphemrfpdnrenpaslnsqqmfqyapvqyapdhyyddfgqyfvqpcippqptppvhpvfgsldavscyseylpfghsyqqdqenipvtsctrksivkkpstfhinsvcsnpncrtrettlwrrtdsgavecngcslyfrkngvqrptelcrktimkrnrrpraevtspdysiinqqsmsqknvlksdhfs
>elegansEND1
myqssssspsphlpytygvidkdgnvhshemhfpdnhgnpspldatqmyqqapvqygggdqyfddfgqyfvqsydpaqqstpvhpmfgsldmmncysqqypqigqdyqqqeienippvstnrkivnkkpstfhtnsvcsnpncrtrettlwrrtdsgaiecngcslyfrkngiqrpaelcrktimkrnrrpraevqsptpedsklchnttplqnipsqhfs
>doughertyiEND1
mypsssssssssspppppentsysygivdkdgnvhshqmhfshdhgnpspvhfeqnlvyqmapapyvmdqgfeefgqyfpayavptqplppvssmlgsfdmtsmnqtyvqyhpqfnqnylqnqenivtvrsrkttpstfhhnsvcsnpncgtrnttlwrrtnngniecngcslyfrkngvqrpaelcnktilkrnrrpraevpssshvnhplqerksmineqqidsendeph
>tropicalisEND1
mypssssssssssppqhqntysygyidkngnmhshqmhfdngnpvdqmpyepvpqpqydqtyedfgqyfvypvqplppvtsvfgsfdvtpmnpgyvqypqqtyipeqenyggkprksipkkpstyhiksvcsnpncgtrqttlwrrtesgavecngcslyfrkngvqrpaelcnktimkrnrrpraeltnhdgqhkqlqqgeqypgdysggsl
>brenneriEND1
mypssssssssssppqdnnnsyqyayvdkdgnmqthemhfahdhgnpspapsphmgyenippqyvmdpayedfgqyfvqqvynptfpalppvpsvlgsfdmsamnqnympyppqpvyfqegaqeqfvvkpkkthtkkattpfhqnsvcsnpncrtrqttlwrrtdagtiecngcslyfrkngvqrpaelcnktimkrnrrpraeslqprvltvppesalenfetn
>remaneiEND1
mypissssssstssppsnthntsyaygivdkdgnihshemhfshdhgnpspvhtpqmydpiatpflmdphfedfgqyfvpsyvpplqqlppvnsvfgsfdismnnivnneqypqypeigmnyvqvqeqenlaptprknsggrkpsafhhnsvcsnpncgtrqttlwrrtdsgaiecngcslyfrkngvqrpadlcnkvimkrnrrprvetqlpvsrgvsnlqeqstqqlqkienvqll
>latensEND1
myplssssssssssppsnthntsyaygivdkdgnihshemhfshdhgnpspvhtpqmydpiatpflmdphfedfgqyfvpsyvpplqqlppvnsvfgsfdismnnivnneqypqypeigmnyvqeqeqenvspaprknsggrkpsafhhnsvcsnpncgtrqttlwrrtdsgaiecngcslyfrkngvqrpadlcnkvimkrnrrprvetqlsrgdsnlqeqstqqlqnienvqll
>nigoniEND1
mypissssssassssstpplapytygvmdkdgnivahemhfsedhgnpspvhtptmyeptgsqymmdplyedfgqyfvppyvapaapvvpvnsmfgnfdmsmnqnylqypqfgqnymaqenfvmqvkekksagkssgirkpstfhhnsvcsnpscgtrqttlwrrtdsgaiecngcslyfrkngvqrpadlcnkqilkrnrrpraspgvpviqintavvhqehnhtteqlhadrll
>briggsaeEND1
mypissssssassssstpplapytygvmdkdgnivahemlfsedhgkpspvhtptmyeptgsqymmdplyedfgqyfavppyvaptapvvpvnpmfgsfdmsmnqnylqypqfgqnymaqenlvmqvkekkstgkssvirkpstfhhnsvcsnpscgtrqttlwrrtdsgaiecngcslyfrkngvqrpadlcnkqilkrnrrpraspgvpviqvntavvhqehnqttepmhagrll
>sinicaEND1
mypisssssfssssltpppsqhvpytyaivdkhgniahhemhfpedhgnpspvptpmyetapqqymmdphyedfgqyfavppyvppmtplppvnsmfgsfdvsmnnnymeyppmgqtfipvetnvmgtkqkkssgkshgnrkpstfhhnsvcsnpncgtrettlwrrtdsgaiecngcslyfrkngvqrpadlcnktilkrnrrpradpvirviqvtpieteenpidqplhvevgnnqll
>zanzibariEND1
myqissssssssssltpppsqhvpytygvmdkhgnivahemhfsddhgnpspvntpmydpapqqymmdpnyedfgqyfippyvaplapmgplppvnsmfgsfdvsmnnnnyieypqmtqaflpiqnenmnvvptkkkttakanrkpstfhhnsvcsnpscgtrettlwrrtdsgaiecngcslyfrkngvqrpadlcnktilkrnrrpraepvirvaadvvdtpehnqll
>tribulationisEND1
mypissssssssssssftppptqhvpytygvmdkhgnivahemhfpedhgnpspvntsmyepapqqfmmdplyedfgqyfavppyvaplapmgplppvnsmfgsfdvsmnnnnnymeyppmnqtyqhvntenaamsmkpkkstgkavrkvstfhhnsvcsnpscgtrettlwrrtdsgaiecngcslyfrkngvqrpadlcnktilkrnrrpradpvvrvisvasdvddqgdhvnqplhvnvehnqll
